# Supplementary material for: Risk of Peritumoral Invasion in Rat Glioblastoma: Nomogram-based Ultrasound Localization Microscopy
Source: Research Square preprint supplement (doi:10.21203/rs.3.rs-6464545/v1), 2025-05-19
Supplement: Supplementary file 1 [file 9cc76312f4142c8e89d20d18.docx]

**Supplementary Table 1** Scanning parameters of MRI sequence

| **Parameters** | **T2** | **DWI** | **T1CE** |
| --- | --- | --- | --- |
| TE (msec) | 92.96 | 71 | 11.38 |
| TR (msec) | 3963 | 3902 | 1143 |
| FOV (mm) | 60 | 80 | 35 |
| Slice thickness (mm) | 1.0 | 1.1 | 1.0 |
| Slices | 22 | 22 | 22 |
| Slice gap (mm) | 0 | 50 | 0 |
| Laser flip angle (°) | 90 | 90 | 90 |
| Cohesion flip angle (°) | 140 | 150 | 150 |
| BWTH (Hz) | 200 | 960 | 200 |

### **Supplementary Table 2** Distribution of section counts per rat

| **Number of slices** | **Model** | **Total number of sections** |
| --- | --- | --- |
| 1 | Rat1, Rat4, Rat6, Rat10, Rat16, Rat17, Rat19, Rat26 | 104 |
| 2 | Rat2, Rat3, Rat5, Rat8, Rat14, Rat20, Rat28 |
| 3 | Rat7, Rat9, Rat12, Rat13, Rat15, Rat30, Rat32 |
| 4 | Rat18, Rat21, Rat22, Rat24, Rat25, Rat29, Rat31, Rat33, Rat35 |
| 5 | Rat11, Rat23, Rat27, Rat34, Rat36 |

b

a

**Supplementary Fig. 1** The forest plot displays the OR and its 95% confidence interval. **a** Presenting the results of univariate analysis; **b** A multivariate analysis was conducted based on AIC to evaluate the impact of different variables.
